# Supplementary material for: Machine learning enhanced spectroscopic analysis: towards autonomous chemical mixture characterization for rapid process optimization
Source: Royal Society of Chemistry journal article supplement (doi:10.1039/d1dd00027f), 2021-12-23
Supplement: d1dd00027f1.pdf [file d1dd00027f1.pdf]

## Supporting Information

# **Machine Learning Enhanced Infrared Spectroscopy Analysis for Rapid Mixture Characterization**

Andrea Angulo, Lankun Yang, Eray S, Aydil and Miguel A. Modestino\*.

Department of Chemical and Biomolecular Engineering, Tandon School of Engineering, New  
York University

\*E-mail: [modestino@nyu.edu](mailto:modestino@nyu.edu)

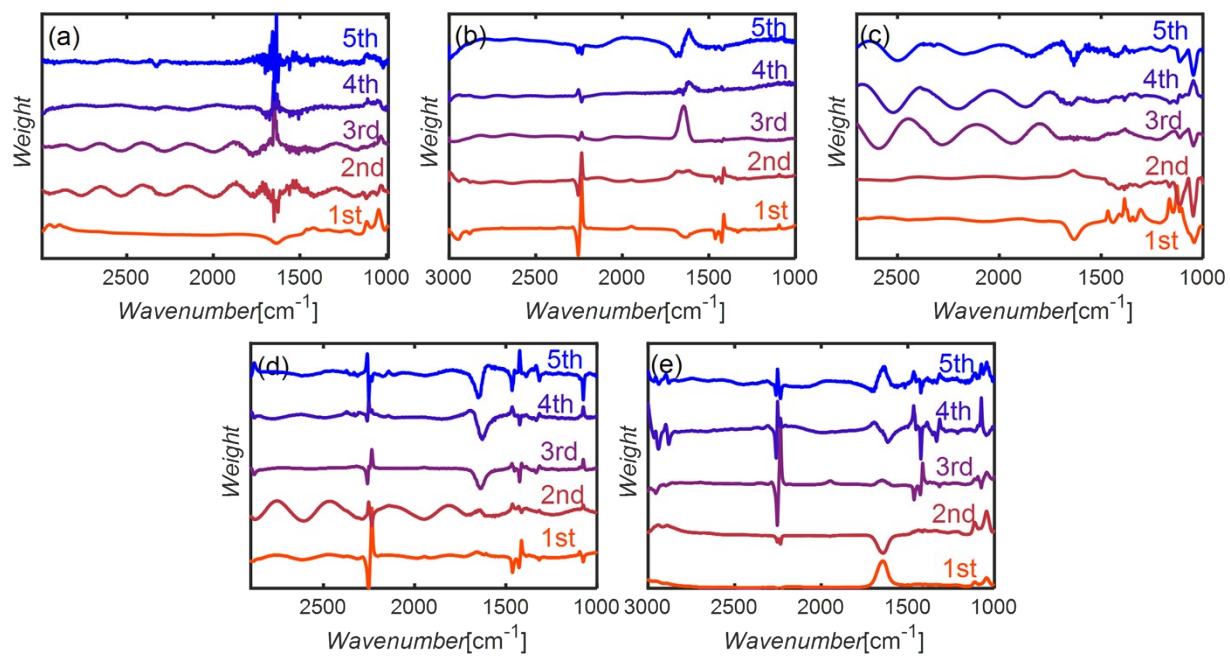

Figure S1. Weight (or loading) per component, for the five components with the highest explained variance vs. wavenumber, resulting from PCA applied to (a) 1-Gly, (b) 2-AN, (c) 3-Gly, (d) 3-AN and (e) 4-AN mixtures

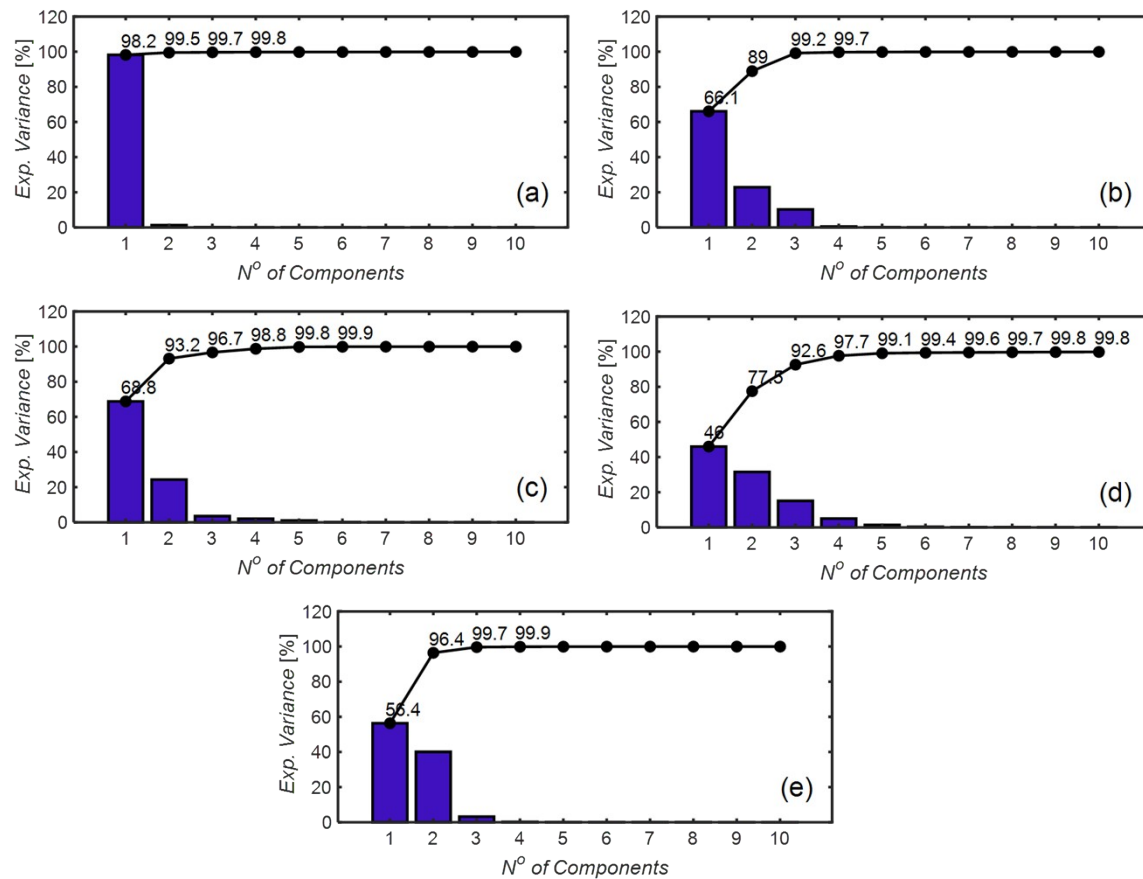

Figure S2. Principal component analysis explained variance, individual (blue bars) and cumulative (black line), for (a) 1-Gly, (b) 2-AN, (c) 3-Gly, (d) 3-AN and (e) 4-AN mixtures

**Table S1.** Concentrations of the prepared aqueous stock solutions

| Prepared Aqueous Solution | % wt     |
|---------------------------|----------|
| Glycerol                  | 5.0-10.0 |
| IPA                       | 8.8      |
| 1-Butanol                 | 7.3      |
| AN                        | 4.1      |
| ADN                       | 4.2      |
| PN                        | 3.8      |

**Table S2.** Components considered for systems of different complexity for synthetically generated data

| Number of components | Components                                             |
|----------------------|--------------------------------------------------------|
| 1                    | ADN                                                    |
| 2                    | ADN, AN                                                |
| 3                    | ADN, AN, PN                                            |
| 4                    | ADN, AN, PN, EDTA                                      |
| 5                    | ADN, AN, PN, EDTA, PO <sub>4</sub> <sup>3-</sup>       |
| 6                    | ADN, AN, PN, EDTA, PO <sub>4</sub> <sup>3-</sup> , TMA |

**Table S3.** Components considered for 3 different chemical systems

| Mixture Label       | Components                                                                       |
|---------------------|----------------------------------------------------------------------------------|
| ADN-containing      | ADN, AN, PN, EDTA, PO <sub>4</sub> <sup>3-</sup> , TMA                           |
| Glycerol-containing | Glycerol, acetic acid, dihydroxyacetone, formic acid, glycolic acid, oxalic acid |
| Random              | Ethylene glycol, propionic acid, 1,2-propanediol, phenol, hexane, benzene        |

**Table S4.** Hidden layers sizes and activation functions used for ANN models (multilayer perceptron regressor) for each type of mixture considered. The rest of the hyperparameter other than layer sizes and activation function are the same in all cases, which are the following: tol = 1e-5, random\_state = 0, solver = 'lbfgs', learning\_rate = 'adaptive', batch\_size = 80 for simulated data, batch\_size = 10 for experimental data

| Mixture                                                                                                                                                                                                               | Hidden layers size | Activation Function |
|-----------------------------------------------------------------------------------------------------------------------------------------------------------------------------------------------------------------------|--------------------|---------------------|
| Simulated data:<br>1 component AN<br>2 components AN, ADN<br>3 components AN, ADN, PN<br>4 components AN, ADN, PN, EDTA<br>5 components AN, ADN, PN, EDTA, PO <sub>4</sub> <sup>3-</sup>                              | (12,)              | Rectifier           |
| Simulated data:<br>6 components AN, ADN, PN, EDTA, PO <sub>4</sub> <sup>3-</sup> , TMA<br>6 components Acetic acid, Dihydroxyacetone, Formic acid, Glycerol, Glycolic acid, Oxalic acid, Water<br>6 components Random | (20,)              | Rectifier           |
| Experimental data:<br>1 component Glycerol in water with                                                                                                                                                              | (2,)               | Rectifier           |
| Experimental data<br>2 components AN ADN with<br>3 components Glycerol, IPA, 1-butanol<br>4 components AN ADN PN Glycerol                                                                                             | (10,10)            | Identity            |
| 3 components AN ADN PN                                                                                                                                                                                                | (20,)              | Rectifier           |

**Table S5.** Coefficient of determination  $R^2$  for different activation functions, for ANN regression algorithms for experimental mixtures. Under the coefficient of determination is also noted the number of neurons per layers for each case.

| Mixture | Activation Function |                   |                   |                   |
|---------|---------------------|-------------------|-------------------|-------------------|
|         | 'identity'          | 'relu'            | 'tanh'            | 'logistic'        |
| 1-Gly   | 0.9800<br>(2,)      | 0.9808<br>(2,)    | 0.9778<br>(2,)    | 0.9808<br>(2,)    |
| 2-AN    | 0.9810<br>(10,10)   | 0.9518<br>(15,15) | 0.9314<br>(15,15) | 0.9262<br>(10,10) |
| 3-Gly   | 0.9815<br>(10,10)   | 0.959<br>(15,15)  | 0.9695<br>(10,10) | 0.9712<br>(10,)   |
| 3-AN    | 0.9215<br>(15,15)   | 0.9686<br>(20,)   | 0.9541<br>(20,)   | 0.7642<br>(10,)   |
| 4-AN    | 0.8527<br>(10,10)   | 0.7768<br>(20,)   | 0.7577<br>(20,)   | 0.5832<br>(20,)   |
